# Supplementary material for: Public attitudes toward allocating scarce resources in the COVID-19 pandemic
Source: PubMed Central journal article supplement (PMC7641460; doi:10.1371/journal.pone.0240651), 2020-11-04
Supplement: pone.0240651.s001.pdf [file pone.0240651.s001.pdf]

# Public Attitudes Toward Allocating Scarce Resources in the Covid-19 Pandemic

## Sample Demographics

**Table 1. Demographic characteristics of the sample in Experiment 1**

| Demographic                    |                           | Frequency | Percent |
|--------------------------------|---------------------------|-----------|---------|
| Self-identified Biological Sex | Female                    | 226       | 36.30   |
| Age                            |                           | 37 (12)   |         |
| Race                           | White                     | 438       | 70.40   |
|                                | Black                     | 66        | 10.60   |
|                                | Hispanic                  | 47        | 7.60    |
|                                | Asian                     | 63        | 10.10   |
|                                | Other                     | 7         | 1.10    |
| Native Language                | English                   | 588       | 95.00   |
| Education                      | High School               | 56        | 9.00    |
|                                | Some College              | 97        | 15.60   |
|                                | 2 Year Degree             | 53        | 8.50    |
|                                | 4 Year Degree             | 298       | 47.90   |
|                                | Postgraduate/Professional | 117       | 18.80   |
| Hospital Visit in 5 Years      | Yes                       | 224       | 36.00   |
| Hospital Training              | Yes                       | 134       | 21.90   |

**Table 2. Demographic characteristics of the sample in Experiment 2**

| Demographic                    |                           | Frequency | Percent |
|--------------------------------|---------------------------|-----------|---------|
| Self-identified Biological Sex | Female                    | 274       | 45.10   |
| Age                            |                           | 38 (35)   |         |
| Race                           | White                     | 429       | 70.70   |
|                                | Black                     | 52        | 8.60    |
|                                | Hispanic                  | 39        | 6.40    |
|                                | Asian                     | 79        | 13.00   |
|                                | Other                     | 6         | 1.00    |
| Native Language                | English                   | 564       | 92.90   |
| Education                      | High School               | 55        | 9.10    |
|                                | Some College              | 103       | 17.00   |
|                                | 2 Year Degree             | 54        | 8.90    |
|                                | 4 Year Degree             | 282       | 46.50   |
|                                | Postgraduate/Professional | 111       | 18.30   |
| Hospital Visit in 5 Years      | Yes                       | 218       | 35.90   |
| Hospital Training              | Yes                       | 117       | 19.30   |

**Table 3. Demographic characteristics of the sample in Experiment 3**

| Demographic                    |                           | Frequency | Percent |
|--------------------------------|---------------------------|-----------|---------|
| Self-identified Biological Sex | Female                    | 246       | 38.50   |
| Age                            |                           | 39(13)    |         |
| Race                           | White                     | 501       | 78.40   |
|                                | Black                     | 73        | 11.40   |
|                                | Hispanic                  | 23        | 3.60    |
|                                | Asian                     | 34        | 5.30    |
|                                | Other                     | 8         | 1.30    |
| Native Language                | English                   | 602       | 94.20   |
| Education                      | High School               | 48        | 7.50    |
|                                | Some College              | 78        | 12.20   |
|                                | 2 Year Degree             | 42        | 6.60    |
|                                | 4 Year Degree             | 349       | 54.60   |
|                                | Postgraduate/Professional | 122       | 19.10   |
| Hospital Visit in 5 Years      | Yes                       | 241       | 37.70   |
| Hospital Training              | Yes                       | 165       | 25.80   |
